# Supplementary material
Source: PubMed Central journal article supplement (PMC4704222)

**Supplementary Table 1.** Reference method MIC results (mg/L) for the two *A. fumigatus* QC strains and for the *C. krusei* QC strain with the recommended MIC ranges (mg/L) given in parenthesis.

|                | MIC (mg/L) obtained by the specified methods   |                                                  |                                             |
|----------------|------------------------------------------------|--------------------------------------------------|---------------------------------------------|
|                | <i>A. fumigatus</i> ATCC MYA2636<br>(CLSI 48h) | <i>A. fumigatus</i> ATCC 204305<br>(EUCAST 48 h) | <i>C. krusei</i> ATCC 6258<br>(EUCAST 24 h) |
| ASP2397        | 0.25 (NA)                                      | 0.25 (NA)                                        | >4 (NA)                                     |
| Amphotericin B | 0.25 (0.5-4)                                   | 0.25 (0.25-1)                                    | 0.25 (0.125-1)                              |
| Itraconazole   | 0.125 (0.25-2)                                 | 0.125 (0.125-0.5)                                | ≤ 0.03 (0.03-0.125)                         |
| Posaconazole   | ≤ 0.03 (NA)                                    | ≤ 0.03 (0.03-0.25)                               | ≤ 0.03 (0.015-0.06)                         |
| Voriconazole   | 0.5 (0.25-1)                                   | 0.5 (0.25-1)                                     | 0.125 (0.03-0.25)                           |

**Supplementary Fig 1.** Spectrophotometer readings of growth curves for a wild type *A. fumigatus* isolate (ATCC MYA3626; upper diagram) and a HapE mutant *A. fumigatus* isolate (lower diagram). The inhibition curve for ASP2397 is shown in light blue, for itraconazole in dark blue and for posaconazole in red whereas the growth in 8 growth control wells are shown in the broken black line. Background absorbance in the medium is approx. 0.1 OD.

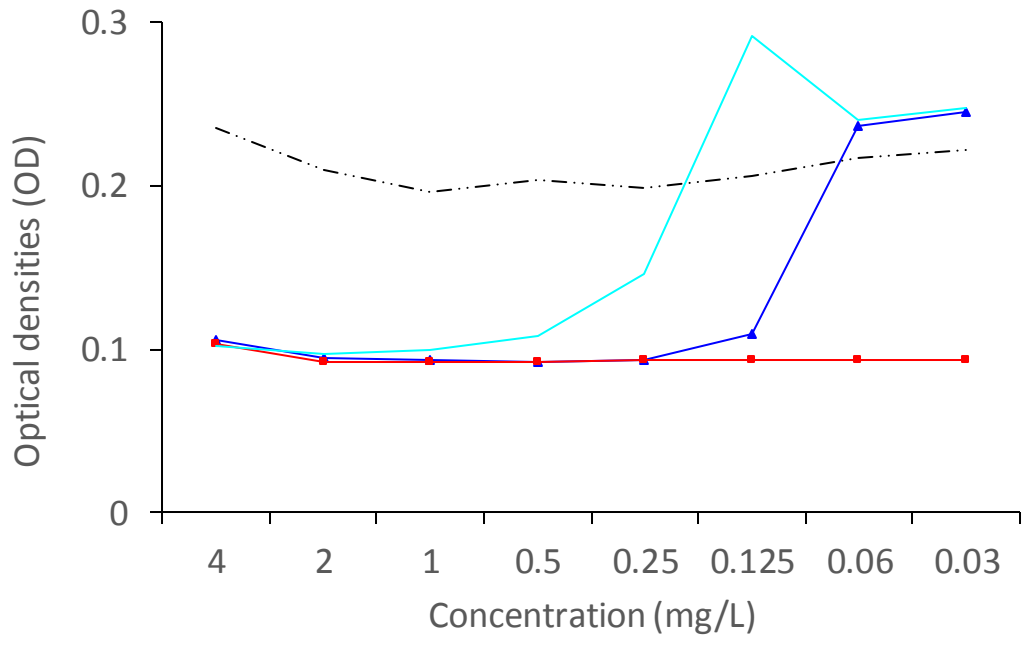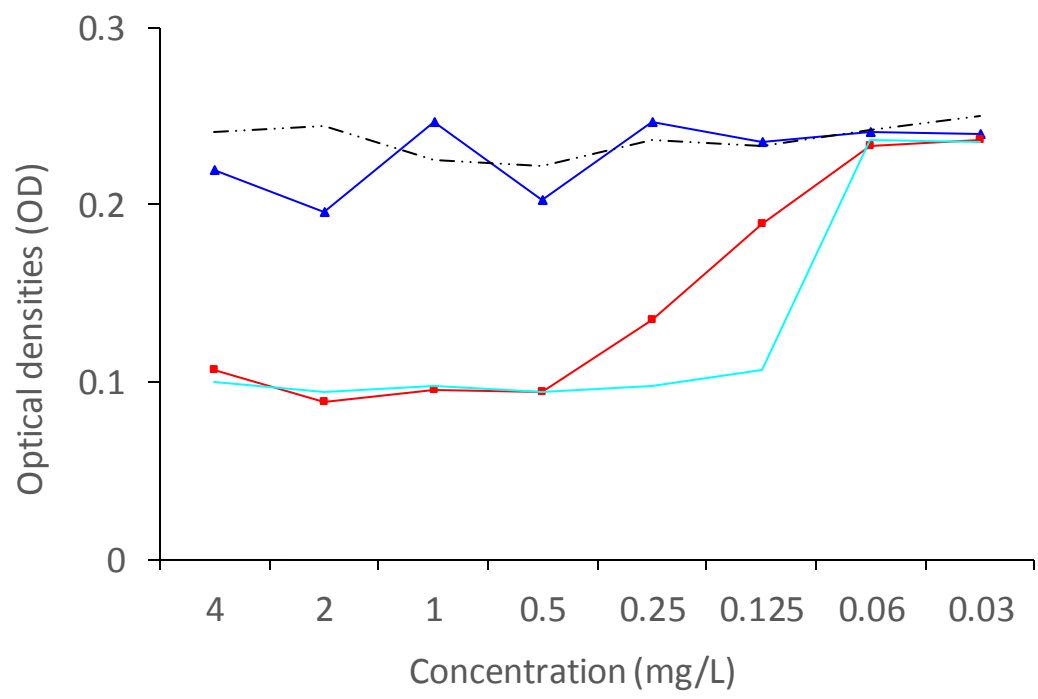

Supplement: AAC.02336-15_zac001164766so1.pdf [file AAC.02336-15_zac001164766so1.pdf]
